# Supplementary material
Source: MDPI journal article supplement (https://www.mdpi.com/1996-1073/12/15/2916)
Supplement: s1 [file s1]

All flows listed in the Life Cycle Inventories (LCI) below are based on ecoinvent 3.3 database.

**Table S1.** DC-DC converter SimaPro modelling with EcoInvent 3.3 processes.

| Inputs                                                                                         | Amount     | Unit      |
|------------------------------------------------------------------------------------------------|------------|-----------|
| Capacitor, for surface-mounting {GLO}   market for   Alloc Def, U*                             | 0,24813    | g         |
| Tantalum, powder, capacitor-grade {GLO}   market for   Alloc Def, U*                           | 0,012866   | g         |
| Capacitor, film type, for through-hole mounting {GLO}   market for   Alloc Def, U*             | 0,01838    | g         |
| Diode, glass-, for surface-mounting {GLO}   market for   Alloc Def, U*                         | 12,2806889 | g         |
| Tin {GLO}   market for   Alloc Def, U*                                                         | 48,13722   | g         |
| Polycarbonate {GLO}   market for   Alloc Def, U*                                               | 24,359014  | g         |
| Inductor, unspecified, at plant/GLO U*                                                         | 0,141526   | g         |
| Resistor, surface-mounted {GLO}   market for   Alloc Def, U*                                   | 0,63169763 | g         |
| Printed wiring board, surface mounted, unspecified, Pb free {GLO}   market for   Alloc Def, U* | 66,168     | g         |
| Integrated circuit, logic type {GLO}   market for   Alloc Def, U*                              | 5,514      | g         |
| Converter, for electric passenger car {GLO}   market for   Alloc Def, U*                       | 5,514      | g         |
| Transistor, unspecified, at plant/GLO U*                                                       | 0,060654   | g         |
| market for printing wiring board, surface mounted, unspecified   Alloc Def, U*                 | 38,5       | g         |
| <b>Output</b>                                                                                  |            |           |
| <b>DC-DC converter</b>                                                                         | <b>1</b>   | <b>pc</b> |

**Table S2.** Two-axis tracker inventory modelled with EcoInvent 3.3 processes.

| Inputs                                                                | Amount     | Unit | Table |
|-----------------------------------------------------------------------|------------|------|-------|
| <b>Energy</b>                                                         |            |      |       |
| Electricity, medium voltage, RER                                      | 176,430928 | kWh  | -     |
| <b>Materials</b>                                                      |            |      |       |
| Zinc coating, pieces/RER U                                            | 41,237     | m2   | -     |
| Steel, unalloyed {GLO}   market for   Alloc Def, U                    | 151,030928 | kg   | -     |
| Polyvinylchloride, bulk polymerised {GLO}   market for   Alloc Def, U | 70,9216495 | kg   | -     |
| Road                                                                  | 159,83     | m2   | C3    |
| Inverter                                                              | 0,00206186 | pc   | C5    |
| Transformer                                                           | 0,00034364 | pc   | C6    |
| Infrastructure                                                        | 1          | pc   | C8    |
| Copper {GLO}   market for   Alloc Def, U                              | 43,9475732 | kg   | -     |

|                                                      |           |           |    |
|------------------------------------------------------|-----------|-----------|----|
| Aluminium, secondary, from new scrap, at plant/RER U | 1,1814433 | kg        | -  |
| Motor                                                | 1         | pc        | C4 |
| Tracker foundation                                   | 1         | pc        | C7 |
| <b>Output</b>                                        |           |           |    |
| <b>Two-axis tracker</b>                              | <b>1</b>  | <b>pc</b> |    |

Table S3. 1 square meter of road in the CPV power plant in Catania, Sicily.

| <b>Inputs</b>                                                    |               |                      |
|------------------------------------------------------------------|---------------|----------------------|
| <b>Resources</b>                                                 | <b>Amount</b> | <b>Unit</b>          |
| Occupation, traffic area, road network*                          | 30            | m <sup>2</sup> a     |
| <b>Energy</b>                                                    |               |                      |
| Electricity, medium voltage, RER                                 | 0,204         | kWh                  |
| <b>Materials</b>                                                 |               |                      |
| Gravel, crushed, at mine/CH U                                    | 35,33         | kg                   |
| Diesel, burned in building machine/GLO U                         | 12,1          | MJ                   |
| Excavation, hydraulic digger {RER}  processing   Alloc Def, U    | 0,06          | m <sup>3</sup>       |
| Transport, freight, lorry 16-32 metric ton, EURO3 {RER}          | 1,29          | tkm                  |
| Steel, low-alloyed {GLO}  market for   Alloc Def, U              | 0,03          | kg                   |
| <b>Emissions to air</b>                                          |               |                      |
| Particulates, > 10 um                                            | 0,000423      | kg                   |
| Particulates, > 2.5 um, and < 10um                               | 0,000108      | kg                   |
| Heat, waste                                                      | 0,74          | MJ                   |
| <b>Waste to treatment</b>                                        |               |                      |
| Disposal, inert waste, 5% water, to inert material landfill/CH U | 3,22          | kg                   |
| <b>Output</b>                                                    |               |                      |
| <b>Road</b>                                                      | <b>1</b>      | <b>m<sup>2</sup></b> |

Table S4. Inventory of the motor used in the CPV power plant.

| <b>Inputs</b>                                      | <b>Amount</b> | <b>Unit</b> |
|----------------------------------------------------|---------------|-------------|
| Integrated circuit, IC, logic type, at plant/GLO U | 3             | kg          |
| Cable, three-conductor cable, at plant/GLO U       | 15            | m           |
| Ferrite, at plant/GLO U                            | 75            | kg          |
| Steel, low-alloyed, at plant/RER U                 | 67,5          | kg          |
| <b>Output</b>                                      |               |             |
| <b>Motor</b>                                       | <b>1</b>      | <b>pc</b>   |

Table S5. Inventory of one piece of inverter for the two-axis tracking system.

| <b>Inputs</b>                                              | <b>Amount</b> | <b>Unit</b> |
|------------------------------------------------------------|---------------|-------------|
| Aluminium, primary, ingot {GLO}  market for   Alloc Def, U | 131           | kg          |
| Copper {GLO}  market for   Alloc Def, U                    | 335           | kg          |

|                                                      |          |           |
|------------------------------------------------------|----------|-----------|
| Steel, low-alloyed {GLO}   market for   Alloc Def, U | 1438     | kg        |
| Lubricating oil {GLO}   market for   Alloc Def, U    | 881      | kg        |
| <b>Output</b>                                        |          |           |
| <b>Inverter</b>                                      | <b>1</b> | <b>pc</b> |

**Table S6.** Inventory of one piece of transformer.

| <b>Inputs</b>                                                           | <b>Amount</b> | <b>Unit</b> |
|-------------------------------------------------------------------------|---------------|-------------|
| <b>Energy</b>                                                           |               |             |
| Electricity, medium voltage {ES}   market for   Alloc Def, U            | 4578          | kWh         |
| <b>Materials</b>                                                        |               |             |
| Steel, low-alloyed {GLO}   market for   Alloc Def, U                    | 907,25        | kg          |
| Silicone product {GLO}   market for   Alloc Def, U                      | 47,75         | kg          |
| Copper {GLO}   market for   Alloc Def, U                                | 510           | kg          |
| Aluminium, primary, ingot {GLO}   market for   Alloc Def, U             | 356           | kg          |
| Steel, low-alloyed {GLO}   market for   Alloc Def, U                    | 620           | kg          |
| Lubricating oil {GLO}   market for   Alloc Def, U                       | 850           | kg          |
| Polyester-complexed starch biopolymer {GLO}   market for   Alloc Def, U | 53            | kg          |
| <b>Output</b>                                                           |               |             |
| <b>Transformer</b>                                                      | <b>1</b>      | <b>pc</b>   |

**Table S7.** Inventory related to one piece of foundation for the tracker.

| <b>Inputs</b>                                                                  | <b>Amount</b> | <b>Unit</b> |
|--------------------------------------------------------------------------------|---------------|-------------|
| Excavation, hydraulic digger {RER}   processing   Alloc Def, U                 | 10,8982928    | m3          |
| Poor concrete, at plant/CH U                                                   | 0,35964366    | m3          |
| Concrete, normal, at plant/CH U                                                | 10,4732594    | m3          |
| Steel, unalloyed {RER}   steel production, converter, unalloyed   Alloc Def, U | 0,53401635    | ton         |
| <b>Output</b>                                                                  |               |             |
| <b>Tracker foundation</b>                                                      | <b>1</b>      | <b>pc</b>   |

**Table S8.** Inventory of one piece of infrastructure for the two-axis tracker.

| <b>Inputs</b>                                                                  | <b>Amount</b> | <b>Unit</b> |
|--------------------------------------------------------------------------------|---------------|-------------|
| Poor concrete, at plant/CH U                                                   | 0,00921392    | m3          |
| Concrete, normal, at plant/CH U                                                | 0,26832045    | m3          |
| Steel, unalloyed {RER}   steel production, converter, unalloyed   Alloc Def, U | 0,01368127    | t           |
| Poor concrete, at plant/CH U                                                   | 0,00727191    | m3          |
| Concrete, normal, at plant/CH U                                                | 0,21176675    | m3          |
| Steel, unalloyed {RER}   steel production, converter, unalloyed   Alloc Def, U | 0,01079768    | t           |
| Road {GLO}   market for   Alloc Def, U                                         | 0,00384197    | my          |
| <b>Output</b>                                                                  |               |             |
| <b>Infrastructure</b>                                                          | <b>1</b>      | <b>pc</b>   |

**Table S9.** Modelling of one piece of CPV mirror module with EcoInvent 3.3 processes.

| <b>Inputs</b>                                                                                      | <b>Amount</b> | <b>Unit</b>    |
|----------------------------------------------------------------------------------------------------|---------------|----------------|
| <b>Energy</b>                                                                                      |               |                |
| Electricity, medium voltage, RER                                                                   | 51,35154      | kWh            |
| <b>Materials</b>                                                                                   |               |                |
| Glass fibre {RER}  production   Alloc Def, U                                                       | 3024          | g              |
| Steel, unalloyed {GLO}  market for   Alloc Def, U                                                  | 336           | g              |
| Aluminium, secondary, from new scrap, at plant/RER U                                               | 15420,40      | g              |
| Aluminium, primary, ingot {GLO}  market for   Alloc Def, U                                         | 811,60        | g              |
| Section bar extrusion, aluminium {GLO}  market for   Alloc Def, U*                                 | 16232         | g              |
| Cadmium {GLO}  market for   Alloc Def, U                                                           | 0,092         | g              |
| Gold {GLO}  market for   Alloc Def, U                                                              | 0,135         | g              |
| Flat glass, uncoated {GLO}  market for   Alloc Def, U                                              | 22            | g              |
| Epoxy resin, liquid {RER}  production   Alloc Def, U                                               | 45,508        | g              |
| Tetrachlorosilane, at plant/GLO U*                                                                 | 50            | g              |
| Polycarbonate {RER}  production   Alloc Def, U                                                     | 5616,516      | g              |
| Sheet rolling, aluminium {RER}  processing   Alloc Def, U                                          | 2970          | g              |
| Solar glass, low-iron {GLO}  market for   Alloc Def, U                                             | 7800          | g              |
| Nylon 6-6 {GLO}  market for   Alloc Def, U                                                         | 42,72         | g              |
| Silicone product {GLO}  market for   Alloc Def, U                                                  | 5             | g              |
| Copper {GLO}  market for   Alloc Def, U                                                            | 2179,609      | g              |
| Diode, glass-, for surface-mounting {GLO}  market for   Alloc Def, U*                              | 15            | g              |
| Silver {GLO}  market for   Alloc Def, U                                                            | 13,2594015    | g              |
| Bisphenol A, powder {GLO}  market for   Alloc Def, U                                               | 0,7425        | g              |
| Electronic component, passive, unspecified {GLO}  market for   Alloc Def, U*                       | 5             | g              |
| Printed wiring board, surface mounted, unspec., solder mix, at plant/GLO U*                        | 244,133477    | g              |
| Electronic component, passive, unspecified {GLO}  market for   Alloc Def, U*                       | 0,135         | g              |
| Printed wiring board, surface mount, at plant/GLO U*                                               | 5,2744887     | g              |
| Butyl acrylate {GLO}  market for   Alloc Def, U                                                    | 3             | g              |
| Wire drawing, copper {GLO}  market for   Alloc Def, U*                                             | 0,135         | g              |
| Laser machining, metal, with CO <sub>2</sub> -laser, 2000W power {GLO}  market for   Alloc Def, U* | 17            | min            |
| Laminating service, foil, with acrylic binder {GLO}  market for   Alloc Def, U*                    | 1,02159635    | m <sup>2</sup> |
| Impact extrusion of aluminium, 1 stroke {GLO}  market for   Alloc Def, U*                          | 5565          | g              |
| Photovoltaic panel factory {GLO}  construction   Alloc Def, U*                                     | 4,00E-06      | pc             |
| <b>Outputs</b>                                                                                     |               |                |
| <b>CPV mirror module</b>                                                                           | <b>1</b>      | <b>pc</b>      |
| <b>Waste</b>                                                                                       |               |                |
| Heat, waste                                                                                        | 36            | kWh            |

**Table S10.** Modelling of one piece of CPV Achromalens module with EcoInvent 3.3 processes.

| <b>Inputs</b>                                                                   | <b>Amount</b> | <b>Unit</b>    |
|---------------------------------------------------------------------------------|---------------|----------------|
| <b>Energy</b>                                                                   |               |                |
| Electricity, medium voltage, RER                                                | 25,497331     | kWh            |
| <b>Materials</b>                                                                |               |                |
| Diode, glass-, for surface-mounting {GLO}  market for   Alloc Def, U*           | 0,23          | g              |
| Aluminium, secondary, from new scrap, at plant/RER U                            | 670,404       | g              |
| Aluminium, primary, ingot {GLO}  market for   Alloc Def, U                      | 35,284        | g              |
| Section bar extrusion, aluminium {GLO}  market for   Alloc Def, U*              | 705,688       | g              |
| Gold {GLO}  market for   Alloc Def, U                                           | 0,188         | g              |
| Epoxy resin, liquid {GLO}  market for   Alloc Def, U                            | 94,95         | g              |
| Electronic component, passive, unspecified {GLO}  market for   Alloc Def, U*    | 5             | g              |
| Steel, unalloyed {GLO}  market for   Alloc Def, U                               | 12            | g              |
| Printed wiring board, surface mounted, unspec., solder mix, at plant/GLO U*     | 5,2744887     | g              |
| Flat glass, uncoated {GLO}  market for   Alloc Def, U                           | 22            | g              |
| Copper {GLO}  market for   Alloc Def, U                                         | 64,4          | g              |
| Cadmium {GLO}  market for   Alloc Def, U                                        | 0,092         | g              |
| Silver {GLO}  market for   Alloc Def, U                                         | 0,37204562    | g              |
| Glass fibre {GLO}  market for   Alloc Def, U                                    | 4210,19       | g              |
| Cable, unspecified {GLO}  market for   Alloc Def, U*                            | 671,163       | g              |
| Injection moulding {RER}  processing   Alloc Def, U                             | 704,64        | g              |
| Laminating service, foil, with acrylic binder {RER}  processing   Alloc Def, U* | 0,3208782     | m <sup>2</sup> |
| Transport, freight, sea, transoceanic ship {GLO}  market for   Alloc Def, U     | 15,433        | tkm            |
| Photovoltaic panel factory {GLO}  construction   Alloc Def, U*                  | 4,00E-06      | pc             |
| Wire drawing, copper {GLO}  market for   Alloc Def, U*                          | 3,18086252    | g              |
| Solar glass, low-iron {GLO}  market for   Alloc Def, U                          | 2936          | g              |
| Polycarbonate {GLO}  market for   Alloc Def, U                                  | 704,64        | g              |
| Vinyl acetate {GLO}  market for   Alloc Def, U                                  | 140,93        | g              |
| <b>Output</b>                                                                   |               |                |
| <b>CPV Achromalens module</b>                                                   | <b>1</b>      | <b>pc</b>      |

**Table S11.** Modelling of the CPV Fresnel lens module with EcoInvent 3.3 processes.

| <b>Inputs</b>                                                         | <b>Amount</b> | <b>Unit</b> |
|-----------------------------------------------------------------------|---------------|-------------|
| <b>Energy</b>                                                         |               |             |
| Electricity, medium voltage, RER                                      | 25,497331     | kWh         |
| <b>Materials</b>                                                      |               |             |
| Diode, glass-, for surface-mounting {GLO}  market for   Alloc Def, U* | 0,23          | g           |
| Aluminium, secondary, from new scrap, at plant/RER U                  | 670,404       | g           |
| Aluminium, primary, ingot {GLO}  market for   Alloc Def, U            | 35,284        | g           |
| Section bar extrusion, aluminium {GLO}  market for   Alloc Def, U*    | 705,688       | g           |

|                                                                                 |            |                |
|---------------------------------------------------------------------------------|------------|----------------|
| Gold {GLO}  market for   Alloc Def, U                                           | 0,188      | g              |
| Epoxy resin, liquid {GLO}  market for   Alloc Def, U                            | 94,95      | g              |
| Electronic component, passive, unspecified {GLO}  market for   Alloc Def, U*    | 5          | g              |
| Steel, unalloyed {GLO}  market for   Alloc Def, U                               | 12         | g              |
| Printed wiring board, surface mounted, unspec., solder mix, at plant/GLO U*     | 5,2744887  | g              |
| Flat glass, uncoated {GLO}  market for   Alloc Def, U                           | 22         | g              |
| Copper {GLO}  market for   Alloc Def, U                                         | 64,4       | g              |
| Cadmium {GLO}  market for   Alloc Def, U                                        | 0,092      | g              |
| Silver {GLO}  market for   Alloc Def, U                                         | 0,37204562 | g              |
| Glass fibre {GLO}  market for   Alloc Def, U                                    | 4210,19    | g              |
| Cable, unspecified {GLO}  market for   Alloc Def, U*                            | 671,163    | g              |
| Injection moulding {RER}  processing   Alloc Def, U                             | 65,92      | g              |
| Laminating service, foil, with acrylic binder {RER}  processing   Alloc Def, U* | 0,3208782  | m <sup>2</sup> |
| Transport, freight, sea, transoceanic ship {GLO}  market for   Alloc Def, U     | 15,433     | tkm            |
| Photovoltaic panel factory {GLO}  construction   Alloc Def, U                   | 4,00E-06   | pc             |
| Wire drawing, copper {GLO}  market for   Alloc Def, U*                          | 3,18086252 | g              |
| Solar glass, low-iron {GLO}  market for   Alloc Def, U                          | 2140,8     | g              |
| Silicone product {GLO}  market for   Alloc Def, U                               | 65,92      | g              |
| <b>Output</b>                                                                   |            |                |
| <b>CPV Fresnel lens module</b>                                                  | <b>1</b>   | <b>pc</b>      |

Table S12. Solar cell inventory.

| <b>Energy</b>                                                                                    |            |                |
|--------------------------------------------------------------------------------------------------|------------|----------------|
| Electricity, medium voltage, RER                                                                 | 0,16724138 | kWh            |
| <b>Materials</b>                                                                                 |            |                |
| Acetone, liquid {GLO}  market for   Alloc Def, U                                                 | 0,13525862 | g              |
| Ethanol, without water, in 99.7% solution state, from ethylene {GLO}  market for   Alloc Def, U* | 0,46134828 | g              |
| Hydrogen peroxide, without water, in 50% solution state {GLO}  market for   Alloc Def, U         | 0,0542069  | g              |
| Isopropanol {GLO}  market for   Alloc Def, U*                                                    | 0,47844828 | g              |
| N-methyl-2-pyrrolidone {GLO}  market for   Alloc Def, U*                                         | 1,50948276 | g              |
| Hydrogen fluoride {GLO}  market for   Alloc Def, U                                               | 0,01194828 | g              |
| Compressed air, 800 kPa gauge {GLO}  market for   Alloc Def, U                                   | 0,02586207 | m <sup>3</sup> |
| Nitrogen, liquid {RER}  market for   Alloc Def, U                                                | 0,04960862 | kg             |
| Natural gas, liquefied {GLO}  market for   Alloc Def, U                                          | 0,00051724 | m <sup>3</sup> |
| Tap water {Europe without Switzerland}  market for   Alloc Def, U                                | 0,00077586 | kg             |
| Phenolic resin {GLO}  market for   Alloc Def, U                                                  | 0,01896552 | g              |
| Silver {GLO}  market for   Alloc Def, U                                                          | 0,00603448 | g              |
| Gold {GLO}  market for   Alloc Def, U                                                            | 0,00051724 | g              |
| Nickel, 99.5% {GLO}  market for   Alloc Def, U                                                   | 0,00034483 | g              |
| Arsine {GLO}  market for   Alloc Def, U                                                          | 0,02586207 | g              |
| Phosphane {GLO}  market for   Alloc Def, U                                                       | 0,00862069 | g              |

|                                                                                                    |            |     |
|----------------------------------------------------------------------------------------------------|------------|-----|
| Gallium, semiconductor-grade {GLO}  market for   Alloc Def, U*                                     | 0,00258621 | g   |
| Indium {RER}  production   Alloc Def, U*                                                           | 0,00137931 | g   |
| Aluminium, cast alloy {GLO}  market for   Alloc Def, U*                                            | 3,4483E-05 | g   |
| Hydrogen, liquid {RER}  market for   Alloc Def, U                                                  | 7,7483E-05 | kg  |
| Hydrochloric acid, without water, in 30% solution state {RER}  market for   Alloc Def, U           | 0,02051724 | g   |
| Nitric acid, without water, in 50% solution state {GLO}  market for   Alloc Def, U                 | 0,01301724 | g   |
| Ammonia, liquid {RER}  market for   Alloc Def, U                                                   | 0,00775862 | g   |
| Copper {GLO}  market for   Alloc Def, U                                                            | 0,00769655 | g   |
| Copper oxide {GLO}  market for   Alloc Def, U                                                      | 0,00273017 | g   |
| Gallium, semiconductor-grade {GLO}  market for   Alloc Def, U*                                     | 0,02080172 | g   |
| Arsenic rock, as P2O5, beneficiated, dry {MA}  phosphate rock beneficiation, dry   Alloc Def, U*   | 0,01366034 | g   |
| Germanium rock, as P2O5, beneficiated, dry {MA}  phosphate rock beneficiation, dry   Alloc Def, U* | 0,04563448 | g   |
| Polypropylene, granulate {GLO}  market for   Alloc Def, U                                          | 1,58413793 | g   |
| Polycarbonate {GLO}  market for   Alloc Def, U                                                     | 0,01420966 | g   |
| Polyethylene, high density, granulate {GLO}  market for   Alloc Def, U                             | 0,65184138 | g   |
| Photovoltaic panel factory {GLO}  construction   Alloc Def, U                                      | 6,4E-09    | pc  |
| Transport, freight, lorry 3.5-7.5 metric ton, EURO6 {GLO}  market for   Alloc Def, U               | 0,00001412 | tkm |

| <b>Outputs</b>                                                                                     |            |     |
|----------------------------------------------------------------------------------------------------|------------|-----|
| Solar cell                                                                                         | 1          | pc  |
| <b>Emissions to air</b>                                                                            |            |     |
| Hydrogen                                                                                           | 0,07748276 | g   |
| Nitrogen, total                                                                                    | 0,00647069 | kg  |
| Heat, waste                                                                                        | 0,03793103 | kWh |
| <b>Waste to treatment</b>                                                                          |            |     |
| Gallium, semiconductor-grade {GLO}  market for   Alloc Def, U*                                     | 0,01040086 | g   |
| Arsenic rock, as P2O5, beneficiated, dry {MA}  phosphate rock beneficiation, dry   Alloc Def, U*   | 0,00683017 | g   |
| Copper {GLO}  market for   Alloc Def, U                                                            | 8,5894E-05 | g   |
| Copper oxide {GLO}  market for   Alloc Def, U                                                      | 3,0469E-05 | g   |
| Germanium rock, as P2O5, beneficiated, dry {MA}  phosphate rock beneficiation, dry   Alloc Def, U* | 0,02281724 | g   |
| Hazardous waste, for underground deposit {GLO}  market for   Alloc Def, U                          | 0,00270999 | g   |

**Table S13.** Wafer packaging.

| EcoInvent 3.3 Name                                | Amount | Unit |
|---------------------------------------------------|--------|------|
| market for polypropylene, granulate*              | 918,8  | g    |
| market for polycarbonate*                         | 8,24   | g    |
| market for polyethylene, high density, granulate* | 378,07 | g    |
| market for isopropanol*                           | 31.452 | g    |
| <b>Output</b>                                     |        |      |
| Wafer package Bow                                 | 1      | pc   |

**Table S14.** EOL processes summary for one piece of mirror-based module.

| End-Of-Life Process (EcoInvent 3.3 Name)                                              | Output process (EcoInvent 3.3 Name)                           | Total Amount | Unit |
|---------------------------------------------------------------------------------------|---------------------------------------------------------------|--------------|------|
|                                                                                       | Steel, low-alloyed {GLO}   market for   Alloc Def, U          | 336,00       | g    |
|                                                                                       | Copper {GLO}   market for   Alloc Def, U                      | 871,84       | g    |
|                                                                                       | Silver {GLO}   market for   Alloc Def, U                      | 13,26        | g    |
|                                                                                       | Steam, in chemical industry {GLO}   market for   Alloc Def, U | 5659,24      | g    |
|                                                                                       | Gold {GLO}   market for   Alloc Def, U                        | 0,14         | g    |
| Steel and iron (waste treatment) {GLO}   recycling of steel and iron   Alloc Def, U   |                                                               | 336,00       | g    |
| Inert waste, for final disposal {GLO}   market for   Alloc Def, U                     |                                                               | 7800,00      | g    |
| Disposal, municipal solid waste, 22.9% water, to sanitary landfill/CH U               |                                                               | 4745,97      | g    |
| Disposal, plastics, mixture, 15.3% water, to municipal incineration/CH U              |                                                               | 5659,24      | g    |
| Disposal, treatment of printed wiring boards/GLO U                                    |                                                               | 294,86       | g    |
| Disposal glass 0% water to inert material landfill/CH                                 |                                                               | 22,00        | g    |
| Hazardous waste, for underground deposit {GLO}   market for   Alloc Def, U            |                                                               | 7,95         | g    |
| Transport, freight, lorry 3.5-7.5 metric ton, EURO6 {GLO}   market for   Alloc Def, U |                                                               | 7,51         | tkm  |
| Diesel, burned in building machine {GLO}   market for   Alloc Def, U                  |                                                               | 22,31        | MJ   |
| Electricity, medium voltage, RER                                                      |                                                               | 8,05         | kWh  |

**Table S15.** EOL processes summary for one piece of Fresnel lens-based module.



| End-Of-Life Process (EcoInvent 3.3 Name)                                              | Output process (EcoInvent 3.3 Name)                           | Total Amount | Unit |
|---------------------------------------------------------------------------------------|---------------------------------------------------------------|--------------|------|
|                                                                                       | Gold {GLO}   market for   Alloc Def, U                        | 0,19         | g    |
|                                                                                       | Steam, in chemical industry {GLO}   market for   Alloc Def, U | 1516,73      | g    |
|                                                                                       | Steel, low-alloyed {GLO}   market for   Alloc Def, U          | 857,57       | g    |
| Disposal, municipal solid waste, 22.9% water, to sanitary landfill/CH U               |                                                               | 4433,38      | g    |
| Disposal, plastics, mixture, 15.3% water, to municipal incineration/CH U              |                                                               | 1516,73      | g    |
| Disposal, treatment of printed wiring boards/GLO U                                    |                                                               | 23,36        | g    |
| Disposal, glass, 0% water, to inert material landfill/CH U                            |                                                               | 2958,00      | g    |
| Hazardous waste, for underground deposit {GLO}   market for   Alloc Def, U            |                                                               | 2,824        | g    |
|                                                                                       |                                                               |              | k    |
|                                                                                       |                                                               |              | W    |
| Electricity, medium voltage, RER                                                      |                                                               | 1,11         | h    |
|                                                                                       |                                                               |              | tk   |
| Transport, freight, lorry 3.5-7.5 metric ton, EURO6 {GLO}   market for   Alloc Def, U |                                                               | 1,84         | m    |
|                                                                                       |                                                               |              | M    |
| Diesel, burned in building machine {GLO}   market for   Alloc Def, U                  |                                                               | 3,26         | J    |

Table S16. EOL processes summary for one piece of Achromatic lens-based module.

| End-Of-Life Process (EcoInvent 3.3 Name) | Output process (EcoInvent 3.3 Name)                           | Total Amount | Unit |
|------------------------------------------|---------------------------------------------------------------|--------------|------|
|                                          | Gold {GLO}   market for   Alloc Def, U                        | 0,19         | g    |
|                                          | Steam, in chemical industry {GLO}   market for   Alloc Def, U | 671,16       | g    |

|                                                                                      |                                                        |         |     |
|--------------------------------------------------------------------------------------|--------------------------------------------------------|---------|-----|
|                                                                                      | Steel, low-alloyed {GLO}  market for   Alloc Def,<br>U | 12,00   | g   |
| Disposal, municipal solid waste, 22.9% water, to sanitary landfill/CH U              |                                                        | 4423,01 | g   |
| Disposal, plastics, mixture, 15.3% water, to municipal incineration/CH U             |                                                        | 671,16  | g   |
| Disposal, treatment of printed wiring boards/GLO<br>U                                |                                                        | 23,36   | g   |
| Hazardous waste, for underground deposit {GLO}  market for   Alloc Def, U            |                                                        | 2.82    | g   |
| Disposal, glass, 0% water, to inert material landfill/CH U                           |                                                        | 2162,80 | g   |
| Electricity, medium voltage, RER                                                     |                                                        | 0.93    | kWh |
| Transport, freight, lorry 3.5-7.5 metric ton, EURO6 {GLO}  market for   Alloc Def, U |                                                        | 1,69    | tkm |
| Diesel, burned in building machine {GLO}  market for   Alloc Def, U                  |                                                        | 2,72    | MJ  |
